# Supplementary figures and images for: Complete and ‘incomplete’ [2 × 2] grids by self-assembly with a sterically hindered ditopic imidazole hydrazone ligand—structural and magnetic studies
Source: Royal Society of Chemistry journal article supplement (doi:10.1039/b800529j), 2008-01-01

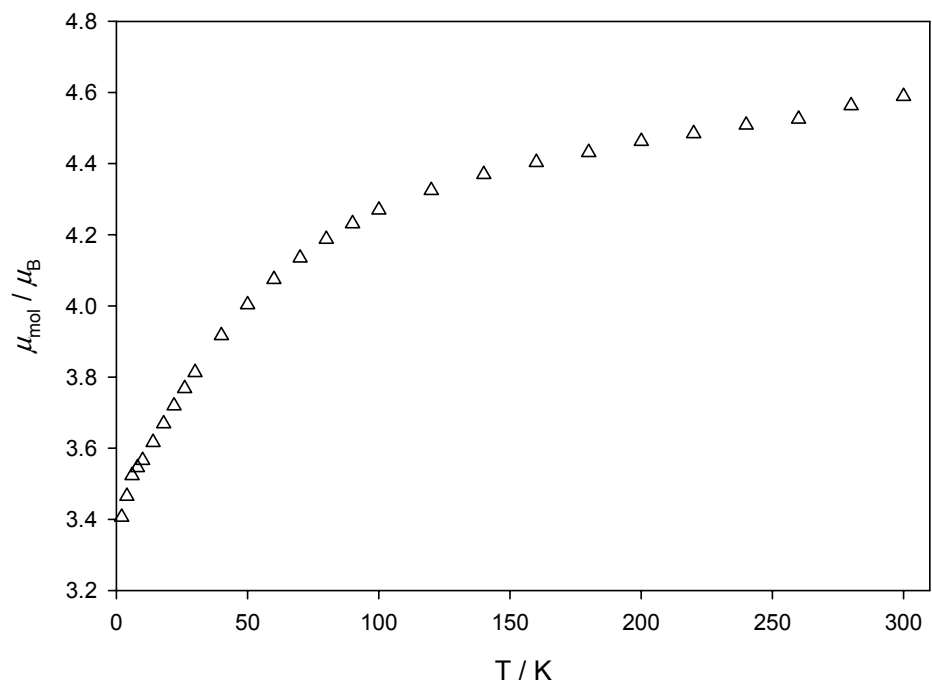

Fig. S1 Variable temperature magnetic data for **1**.

Supplement: b800529j.pdf [file b800529j.pdf]
